# Supplementary material
Source: ML conference proceedings conference paper supplement (https://proceedings.mlr.press/v38/ma15.html)
Supplement: Supplementary file 1 [file ma15-supp.pdf]

# Active Pointillistic Pattern Search: Supplementary Material

Yifei Ma, Dougal J. Sutherland, Roman Garnett, Jeff Schneider

## A Precision Plots for the Experiments

In Section 4 we showed plots for recalls in our three experiments: environmental monitoring (Figure 2), election result prediction (Figure 4), and vortex finding with a black-box classifier (Figure 6). These were the most relevant results, as our goal is to report as many matching patterns as we can when their posterior marginal likelihood pass a pre-determined threshold  $\theta$ . For completeness, we show precision plots here, which are controlled mainly by the classifier and  $\theta$ .

Note that we do not expect precisions to be always above  $\theta (= 0.7)$ , because  $\theta$  controls the error rate at every step, whereas in our problem setup, once an error is made, it cannot be taken back later; this mistake can only be mitigated when more true positives are found at a later time.

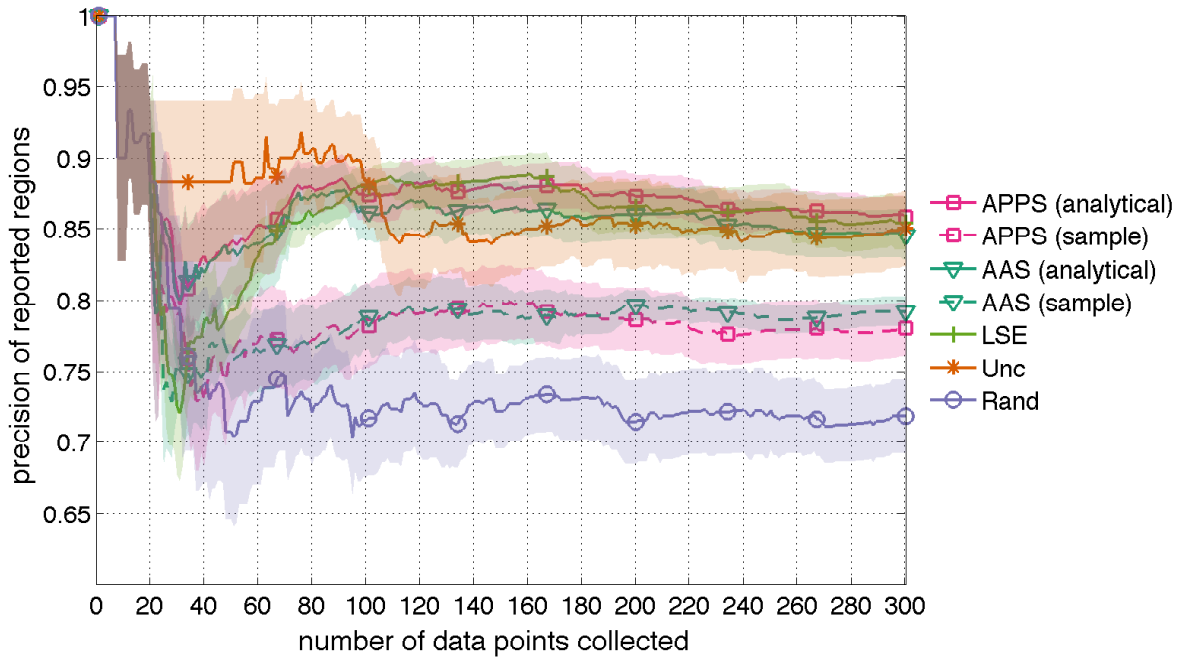

Figure A.1: Precisions for environmental sensing experiment. Color bands indicate standard errors after 15 runs.

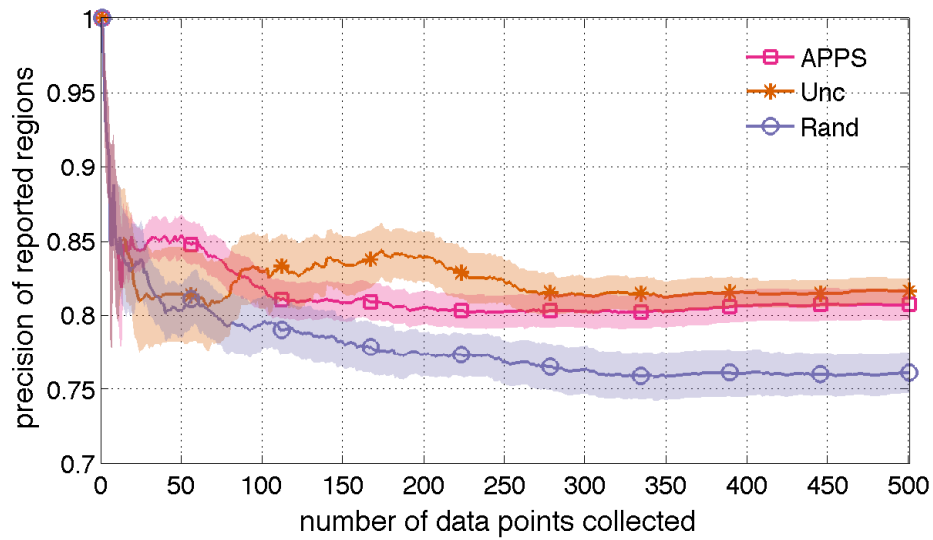

Figure A.2: Precisions for election experiment. Color bands indicate standard errors after 15 runs.

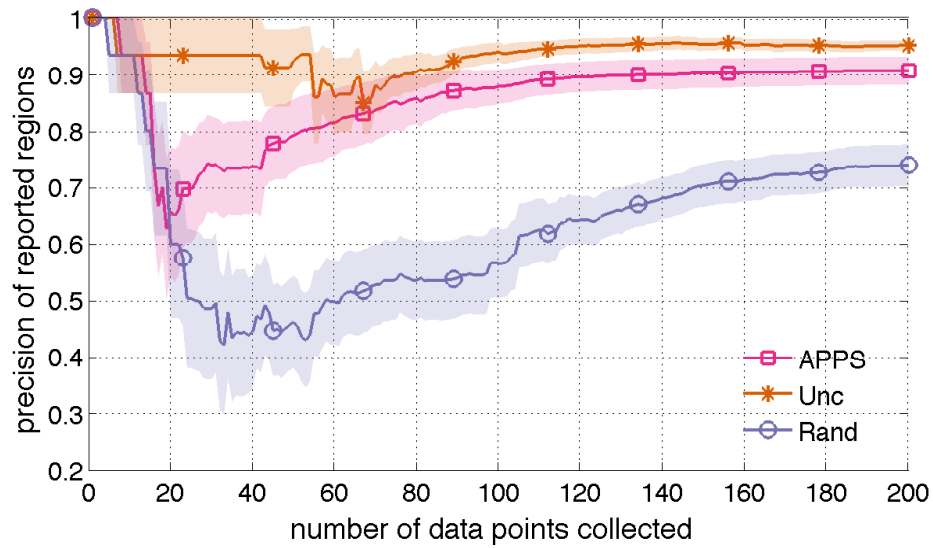

Figure A.3: Precisions for vortex finding experiment. Color bands indicate standard errors after 15 runs.
