# Supplementary material
Source: ML conference proceedings conference paper supplement (https://proceedings.mlr.press/v38/ma15.html)
Supplement: Supplementary file [file ma15-supp.pdf]

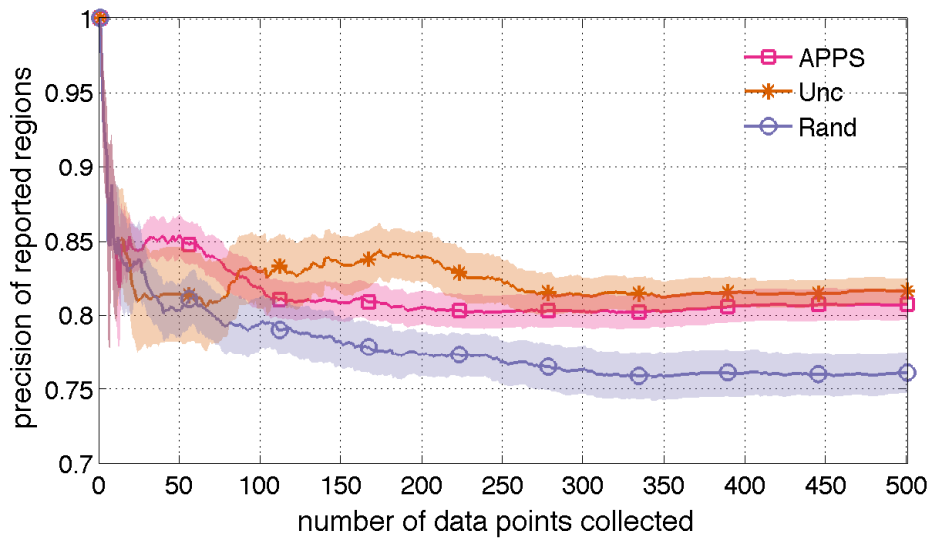

Figure A.2: Precisions for election experiment. Color bands indicate standard errors after 15 runs.

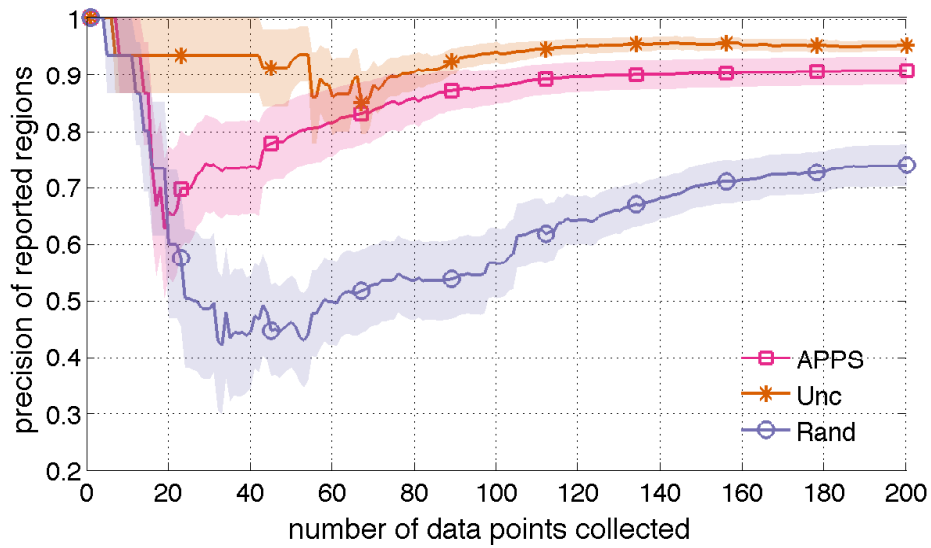

Figure A.3: Precisions for vortex finding experiment. Color bands indicate standard errors after 15 runs.
